# Supplementary material
Source: Springer Nature journal article supplement (https://www.springermedizin.de/resource/supplementary/12884_2011_473_MOESM4_ESM.pdf/9457766)
Supplement: MOESM4 [file 9457766]

**Table 3: RESULT OF UNIVARIATE ANALYSIS LOGISTIC REGRSSION**

| EXPLANATO-RY VARIABLES                | UNDER-5 |         |               |
|---------------------------------------|---------|---------|---------------|
|                                       | OR      | P-value | (C.I)         |
| <b>Maternal factors</b>               |         |         |               |
| <b>Maternal education</b>             |         |         |               |
| No education                          | 1.00    | -       | ( - )         |
| Primary                               | 0.83    | 0.001   | (0.76 – 0.91) |
| Secondary or higher                   | 0.58    | 0.001   | (0.53 – 0.64) |
| <b>Maternal occupation</b>            |         |         |               |
| Not working                           | 1.00    | -       | ( - )         |
| Business or cleric                    | 0.96    | 0.380   | (0.88 – 1.05) |
| Manual                                | 1.02    | 0.683   | (0.93 – 1.12) |
| <b>Parity</b>                         |         |         |               |
| 1                                     | 1.00    | -       | ( - )         |
| 2, 3 and 4                            | 1.60    | 0.001   | (1.37 – 1.87) |
| ≥5                                    | 2.31    | 0.001   | (1.98 – 2.70) |
| <b>Marital status</b>                 |         |         |               |
| Never married                         | 1.00    | -       | ( - )         |
| Currently married                     | 1.38    | 0.047   | (1.00 – 1.90) |
| Formerly married                      | 2.04    | 0.001   | (1.41 – 2.96) |
| <b>Maternal age</b>                   |         |         |               |
| ≤ 20 years                            | 1.00    | -       | ( - )         |
| 21 – 25 years                         | 0.83    | 0.006   | (0.73 – 0.95) |
| 26 – 30 years                         | 0.80    | 0.001   | (0.71 – 0.91) |
| 31 – 35 years                         | 0.86    | 0.024   | (0.75 – 0.97) |
| > 35 years                            | 0.99    | 0.837   | (0.87 – 1.24) |
| <b>Maternal age at first marriage</b> |         |         |               |
| < 15 years                            | 1.00    | -       | ( - )         |
| 15 – 19 years                         | 0.80    | 0.001   | (0.74 – 0.87) |
| 20 – 24 years                         | 0.67    | 0.001   | (0.60 – 0.75) |
| ≥ 25 years                            | 0.61    | 0.001   | (0.52 – 0.72) |
| <b>Family planning</b>                |         |         |               |
| No method                             | 1.00    | -       | ( - )         |
| Traditional                           | 0.45    | 0.001   | (0.35 – 0.58) |
| Modern                                | 0.55    | 0.001   | (0.47 – 0.65) |
| <b>Health Seeking Behaviour</b>       |         |         |               |
| Low                                   | 1.00    | -       | ( - )         |
| Average                               | 1.17    | 0.001   | (1.07 – 1.27) |
| High                                  | 0.55    | 0.001   | (0.50 – 0.62) |
| <b>Preceding birth interval</b>       |         |         |               |
| < 18 months                           | 1.00    | -       | ( - )         |
| 18 – 36 months                        | 0.49    | 0.001   | (0.43 – 0.56) |
| > 36 months                           | 0.30    | 0.001   | (0.26 – 0.34) |
| <b>Breastfeeding</b>                  |         |         |               |
| < 6 months                            | 1.00    | -       | ( - )         |
| 6 – 12 months                         | 0.27    | 0.001   | (0.24 – 0.30) |

| EXPLANATORY VARIABLES                | UNDER-5 |         |               |
|--------------------------------------|---------|---------|---------------|
|                                      | OR      | P-value | (C.I)         |
| >12 – 18 months                      | 0.10    | 0.001   | (0.08 – 0.11) |
| >18 months                           | 0.10    | 0.001   | (0.08 – 0.11) |
| <b>Child factors</b>                 |         |         |               |
| <b>Sex</b>                           |         |         |               |
| Male                                 | 1.00    | -       | ( - )         |
| Female                               | 0.87    | 0.001   | (0.81 – 0.93) |
| <b>Birth order</b>                   |         |         |               |
| 1                                    | 1.00    | -       | ( - )         |
| 2, 3 or 4                            | 0.87    | 0.011   | (0.79 – 0.97) |
| ≥5                                   | 1.25    | 0.001   | (1.12 – 1.38) |
| <b>Birth weight</b>                  |         |         |               |
| Average                              | 1.00    | -       | ( - )         |
| Large                                | 0.91    | 0.022   | (0.83 – 0.99) |
| Small                                | 1.39    | 0.001   | (1.38 – 1.70) |
| <b>Paternal &amp; Family factors</b> |         |         |               |
| <b>Family size</b>                   |         |         |               |
| 1 – 5                                | 1.00    | -       | ( - )         |
| >5                                   | 0.77    | 0.001   | (0.71 – 0.80) |
| <b>Sanitation</b>                    |         |         |               |
| Good toilet                          | 1.00    | -       | ( - )         |
| Bad toilet                           | 1.98    | 0.001   | (1.69 – 2.31) |
| <b>Fuel source</b>                   |         |         |               |
| Gas                                  | 1.00    | -       | ( - )         |
| Kerosene                             | 1.48    | 0.193   | (0.82 – 2.69) |
| Others                               | 2.66    | 0.001   | (1.49 – 4.76) |
| <b>No of wives</b>                   |         |         |               |
| One wife                             | 1.00    | -       | ( - )         |
| More wives                           | 1.35    | 0.001   | (1.25 – 1.46) |
| <b>Wealth index</b>                  |         |         |               |
| Poor                                 | 1.00    | -       | ( - )         |
| Rich                                 | 0.69    | 0.001   | (0.64 – 0.74) |
| <b>Water source</b>                  |         |         |               |
| Unsafe water                         | 1.00    | -       | ( - )         |
| Safe water                           | 0.76    | 0.001   | (0.70 – 0.82) |
| <b>Paternal age</b>                  |         |         |               |
| < 22 years                           | 1.00    | -       | ( - )         |
| 22 – 30 years                        | 1.27    | 0.285   | (0.82 – 1.96) |
| >30 – 40 years                       | 1.23    | 0.339   | (0.80 – 1.90) |
| >40 – 50 years                       | 1.28    | 0.260   | (0.83 – 1.98) |
| >50 years                            | 1.67    | 0.022   | (1.08 – 2.59) |
| <b>Paternal occupation</b>           |         |         |               |
| Business / cleric                    | 1.00    | -       | ( - )         |
| Farming                              | 1.18    | 0.001   | (1.08 – 1.29) |
| Manual                               | 1.01    | 0.896   | (0.91 – 1.12) |
| <b>Other factors</b>                 |         |         |               |
| <b>Residence</b>                     |         |         |               |

| EXPLANATORY VARIABLES | UNDER-5 |         |               |
|-----------------------|---------|---------|---------------|
|                       | OR      | P-value | (C.I)         |
| Rural                 | 1.00    | -       | ( - )         |
| Urban                 | 1.53    | 0.001   | (1.40 – 1.68) |
| <b>Ethnicity</b>      |         |         |               |
| Minors                | 1.00    | -       | ( - )         |
| Majors                | 1.02    | 0.546   | (0.95 – 1.10) |
| <b>Regions</b>        |         |         |               |
| North central         | 1.00    | -       | ( - )         |
| North east            | 1.29    | 0.001   | (1.15 – 1.45) |
| North west            | 1.37    | 0.001   | (1.22 – 1.53) |
| South east            | 1.15    | 0.080   | (0.98 – 1.34) |
| South west            | 0.99    | 0.918   | (0.86 – 1.15) |
| South south           | 0.64    | 0.001   | (0.54 – 0.75) |

\*\*\* means variables omitted by StataIC 11 software package
